# Supplementary material for: Thermo-TRPs and gut microbiota are involved in thermogenesis and energy metabolism during low temperature exposure of obese mice
Source: Oxford University Press journal article supplement (doi:10.1242/jeb.218974), 2020-01-01
Supplement: jeb218974supp.pdf [file jeb218974supp.pdf]

Table S1 Prediction of the function of the gut microbiota associated with lipid metabolism

|                                        | Fat                                   |                                      |                                      | <i>P</i><br>fat | Ambient temperature (Ta) |                         | <i>P</i><br>Ta |
|----------------------------------------|---------------------------------------|--------------------------------------|--------------------------------------|-----------------|--------------------------|-------------------------|----------------|
|                                        | Con                                   | Obesity                              | Lean                                 |                 | 23°C                     | 4°C                     |                |
| <b>Adipocytokine signaling pathway</b> | 35193.800±2059.<br>739 <sup>a</sup>   | 28156.571±168<br>5.519 <sup>b</sup>  | 27483.000±174<br>0.797 <sup>b</sup>  | *               | 30142.610±151<br>3.148   | 30412.971±148<br>5.072  | <i>ns</i>      |
| <b>Fatty acid biosynthesis</b>         | 153708.900±910<br>5.456 <sup>b</sup>  | 254233.982±74<br>51.151 <sup>a</sup> | 245999.143±76<br>95.515 <sup>a</sup> | **              | 216635.914±66<br>89.149  | 219325.436±65<br>65.036 | <i>ns</i>      |
| <b>Lipid biosynthesis proteins</b>     | 226159.100±109<br>39.766 <sup>b</sup> | 307230.089±89<br>52.197 <sup>a</sup> | 297295.714±92<br>45.790 <sup>a</sup> | **              | 274898.848±80<br>36.690  | 278891.088±78<br>87.573 | <i>ns</i>      |
| <b>Lipid metabolism</b>                | 35798.600±2962.<br>246 <sup>b</sup>   | 64158.991±242<br>4.057 <sup>a</sup>  | 61717.571±250<br>3.555 <sup>a</sup>  | **              | 53089.067±217<br>6.158   | 54694.375±213<br>5.780  | <i>ns</i>      |
| <b>Glycerolipid metabolism</b>         | 149049.800±102<br>42.972 <sup>b</sup> | 224724.429±83<br>81.999 <sup>a</sup> | 214273.500±86<br>56.892 <sup>a</sup> | **              | 192695.076±75<br>24.804  | 199336.743±73<br>85.185 | <i>ns</i>      |
| <b>Glycerophospholipid metabolism</b>  | 204349.400±985<br>1.181 <sup>b</sup>  | 281218.071±80<br>61.390 <sup>a</sup> | 274066.429±83<br>25.768 <sup>a</sup> | **              | 249782.657±72<br>36.982  | 256639.943±71<br>02.704 | <i>ns</i>      |
| <b>Fatty acid metabolism</b>           | 74009.100±5996.<br>628 <sup>b</sup>   | 130701.429±49<br>07.143 <sup>a</sup> | 120999.143±50<br>68.076 <sup>a</sup> | **              | 109195.371±44<br>05.308  | 107944.410±43<br>23.570 | <i>ns</i>      |

Data are means ± SEM.  $P_{\text{fat}}$ , effect of DIO,  $P_{\text{Ta}}$ , effect of ambient temperature, \*\*,  $P < 0.01$ ; *ns*, non-significant ( $P > 0.05$ ).

Different letters indicate significant between-group differences determined by Tukey post-hoc test ( $P < 0.05$ ).

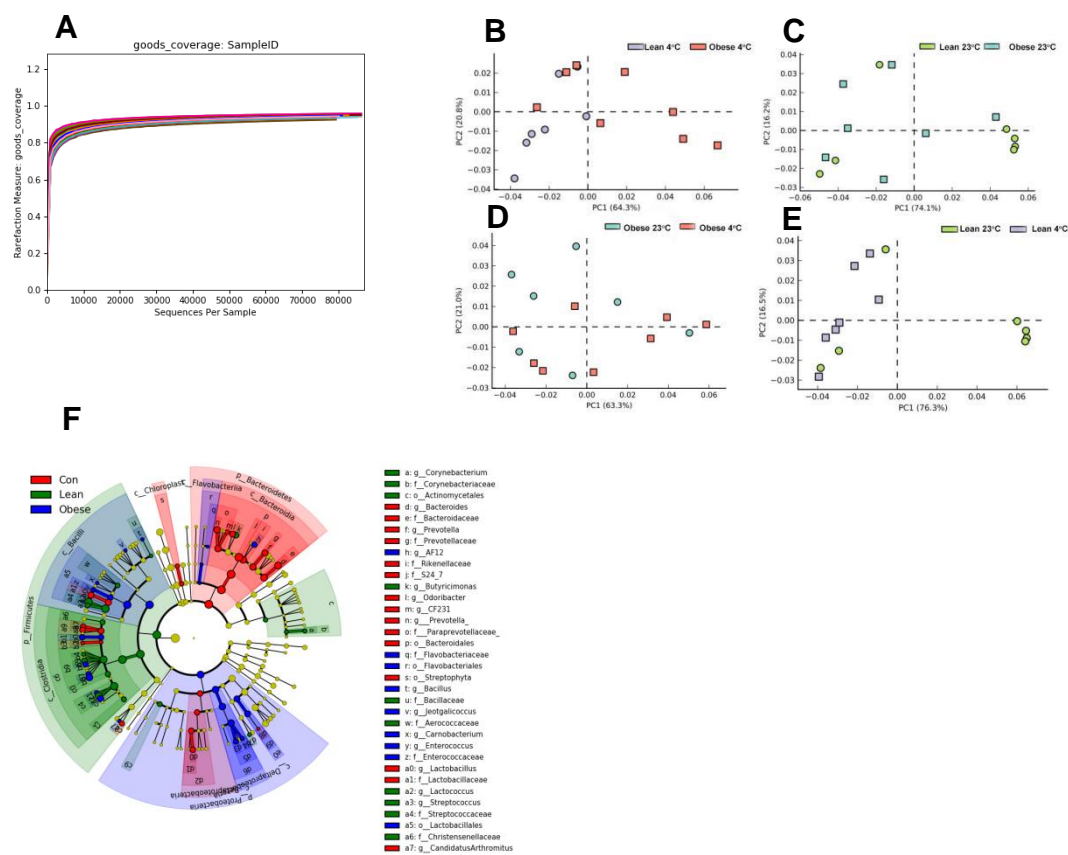

**Fig. S1. DIO and cold exposure alter the diversity and composition of fecal microbiota.** The OTU-level rarefaction curve of Goods coverage across all samples has reached stable values(A). Principal coordinates analysis (PCoA) plots based on unweighted UniFrac distance (B-E). Cladogram representing taxa enriched in fecal microbiota community of the six groups detected by the LEfSe tool. Differences were represented by the color of the most abundant class (F).
